# Supplementary material for: Uncoupling the TFIIH Core and Kinase Modules Leads To Misregulated RNA Polymerase II CTD Serine 5 Phosphorylation
Source: eLife journal article supplement (doi:10.7554/elife.110091), 2026-01-27
Supplement: supp1 [file elife-110091-supp1-v1.pdf]

**Supplementary File 1. Plasmids, yeast strains, and ChIP-seq parameters used in this study.**

**Table A.** Plasmids used in this study.

**Table B.** Yeast strains used in this study.

**Table C.** ChIP-seq parameters for *S. cerevisiae* reads.

**Table D.** ChIP-seq parameters for *S. pombe* reads.

**Table A. Plasmids used in this study.**

| Plasmid             | Features                                                                                                                       | Construction or source reference                                                                                                                                                                                                                                                                                                 |
|---------------------|--------------------------------------------------------------------------------------------------------------------------------|----------------------------------------------------------------------------------------------------------------------------------------------------------------------------------------------------------------------------------------------------------------------------------------------------------------------------------|
| pSBEThis7-TFB3      | T7 promoter driving N-terminal his-tagged TFB3 (1-285) [yeast TFIIH subunit], ArgU, KanR                                       | 962 bp NcoI-Bgl II fragment bearing TFB3 open reading frame from pBS-TFB3 ORF (SB835) was cloned into NcoI + BamHI sites of pSBEThis7. Created by Michael Keogh.                                                                                                                                                                 |
| pBS-TFB3 A          | TFB3 gene with 5' flanking sequence [yeast TFIIH subunit], fl+ ori, AmpR                                                       | TFB3 gene and promoter 2.059 kb fragment PCR'd from yeast genomic DNA using primers TFB3-A (O #411) and TFB3-C (O #413) and Pfu polymerase, and blunt ligated into SrfI site of pCR-Script SK+. Created by M. Keogh.                                                                                                             |
| pRS415-KIN28        | KIN28, LEU2, CEN/ARS, fl+ ori, AmpR                                                                                            | pRS426-KIN28 was digested with BamHI + HindIII. The ~1.3 kb fragment was cloned into BamHI + HindIII digested pRS415.                                                                                                                                                                                                            |
| pBS-TFB3-BUR2       | TFB3 promoter driving TFB3 (1-251)-BUR2 (2-395) fusion with TFB3 5' and 3' flanking sequence, fl+ ori, AmpR                    | ~1.2 kb BUR2 fragment was amplified from pRS316-BUR2 (SB1209) using oligos Tfb3-Bur2 F (O #4287) and Bur2 stop Tfb3 3UTR R (O #4288). ~4.8 kb pBS-Tfb3 backbone was amplified using oligos Tfb3-3UTR F (O #4283) and Tfb3-1753 R (O #4284) on plasmid pBS-TFB3 A (SB836a). Fragments assembled through Gibson Assembly.          |
| pBS-TFB3-CTK3       | TFB3 promoter driving TFB3 (1-251)-CTK3 (2-296) fusion with TFB3 5' and 3' flanking sequence, fl+ ori, AmpR                    | ~900 bp CTK3 fragment was amplified from pJYC4501 (F716) using oligos Tfb3-Ctk3 F (O #4285) and Ctk3 stop Tfb3 3UTR R (O #4286). ~4.8 kb pBS-Tfb3 backbone was amplified using oligos Tfb3-3UTR F (O #4283) and Tfb3-1753 R (O #4284) on plasmid pBS-TFB3 A (SB836a). Fragments assembled through Gibson Assembly.               |
| pRS425-TFB3 (1-144) | TFB3 (1-144), LEU2, 2 $\mu$ ori, fl+ ori, AmpR                                                                                 | Oligos Tfb3- 3UTR F (O #4283) and TFB3 Ile144-Stop (O #4335) were used for inverse PCR on pRS425-TFB3 (SB1968). The resulting ~8.2 kb fragment was ligated by intramolecular Gibson isothermal assembly.                                                                                                                         |
| pRS425-TFB3 (1-251) | TFB3 (1-251), LEU2, 2 $\mu$ ori, fl+ ori, AmpR                                                                                 | Oligos Tfb3- 3UTR F (O #4283) and TFB3 Leu251-Stop (O #4336) were used for inverse PCR on pRS425-TFB3 (SB1968). The resulting ~8.5 kb fragment was ligated by intramolecular Gibson isothermal assembly.                                                                                                                         |
| pRS425-TFB3         | TFB3, LEU2, 2 $\mu$ ori, fl+ ori, AmpR                                                                                         | ~1.9 kb BamHI-Sal I fragment from pBS-TFB3 A (SB836a) cloned into the BamHI - Sal I sites of pRS425 (YV27).                                                                                                                                                                                                                      |
| pRS425-TFB3-MPK1    | TFB3 promoter driving TFB3 (1-251)-MPK1 (2-484) fusion with TFB3 5' and 3' flanking sequence, LEU2, 2 $\mu$ ori, fl+ ori, AmpR | ~8.5 kb pRS425-Tfb3 backbone fragment was amplified from pRS425-TFB3 (SB1968) using oligos Tfb3- 3UTR F (O #4283) and Tfb3- 1753 R (O #4284). ~1.5 kb Mpk1 fragment was amplified from genomic DNA with oligos Tfb3-Mpk1 for (O #4323) and Tfb3-Mpk1 rev (O #4324). Fragments were assembled through Gibson isothermal assembly. |
| pRS425-TFB3-BUR2    | TFB3 promoter driving TFB3 (1-251)-BUR2 (2-395) fusion with TFB3 5' and 3' flanking sequence, LEU2, 2 $\mu$ ori, fl+ ori, AmpR | ~3 kb fragment was amplified from pBS-TFB3-BUR2 (SB1973) and using oligos T3 sequencing primer (O #242) and KS poly: EcoRV-EcoRI-Pst (O #4260). ~6.8 kb pRS425 (YV27) backbone was digested with BamHI and SacI. Fragments assembled through Gibson isothermal assembly.                                                         |
| pRS425-TFB3-CTK3    | TFB3 promoter driving TFB3 (1-251)-CTK3 (2-296) fusion with TFB3 5' and 3' flanking                                            | ~2.7 kb fragment was amplified from pBS-Tfb3-CTK3 (SB1974) using oligos T3 sequencing primer (O #242) and KS poly: EcoRV-EcoRI-Pst (O #4260). ~6.8 kb                                                                                                                                                                            |

|                                        |                                                                                                                             |                                                                                                                                                                                                      |
|----------------------------------------|-----------------------------------------------------------------------------------------------------------------------------|------------------------------------------------------------------------------------------------------------------------------------------------------------------------------------------------------|
|                                        | sequence, LEU2, 2 $\mu$ ori, fl+ ori, AmpR                                                                                  | pRS425 (YV27) backbone was digested with BamHI and SacI. Fragments assembled through Gibson isothermal assembly.                                                                                     |
| pRS424-TFB3                            | TFB3, TRP1, 2 $\mu$ ori, fl+ ori, AmpR                                                                                      | ~1.9 kb BamHI-Sal I fragment from pRS425-TFB3 (SB1968) cloned into the BamHI - Sal I sites of pRS424 (YV26).                                                                                         |
| pRS424-TFB3 (1-251)                    | TFB3 (1-251), TRP1, 2 $\mu$ ori, fl+ ori, AmpR                                                                              | ~1.7 kb BamHI-Sall fragment from pRS425-TFB3 (1-251) (SB1994) and was cloned into the BamHI - Sal I sites of pRS424 (YV26).                                                                          |
| pRS424-TFB3 (1-144)                    | TFB3 (1-144), TRP1, 2 $\mu$ ori, fl+ ori, AmpR                                                                              | ~1.4 kb BamHI-Sall fragment from pRS425-TFB3 (1-144) (SB1991) was cloned into the BamHI - Sal I sites of pRS424 (YV26).                                                                              |
| pRS425                                 | LEU2, 2 $\mu$ ori, fl+ ori, pBluescriptII SK polylinker with T7 and T3 promoters flanking, blue-white color selection, AmpR | Sikorski and Hieter (1989) Genetics 122: 19-27.                                                                                                                                                      |
| pRS315                                 | LEU2, CEN/ARS, fl+ ori, pBluescript KS+ polylinker, blue-white color selection, AmpR                                        | Sikorski and Hieter (1989) Genetics 122: 19-27.                                                                                                                                                      |
| pRS425-TFB3 (1-11, 238-Stop)           | TFB3 (1-11, 238-Stop), LEU2, 2 $\mu$ ori, fl+ ori, AmpR                                                                     | Oligos TFB3 33 R (O #4334) and TFB3 Asp11-Pro238 (O #4339) were used for inverse PCR on pRS425-TFB3 (SB1968). The resulting ~8 kb fragment was ligated by intramolecular Gibson isothermal assembly. |
| pRS315-TFB3 (1-11, 238-Stop)-Flag1-TAP | TFB3 (1-11, 238-Stop)-Flag1-TAP, LEU2, CEN/ARS, fl+ ori, AmpR                                                               | Primers TFB3 33 R (O #4334) and TFB3 Asp11-Pro238 (O #4339) were used for inverse PCR on pSH1542 (F1255). The resulting ~7.3 kb fragment was ligated by intramolecular Gibson assembly.              |
| pRS425-TFB3 (1-11, 139-Stop)           | TFB3 (1-11, 139-Stop), LEU2, 2 $\mu$ ori, fl+ ori, AmpR                                                                     | Primers TFB3 33 R (O #4334) and TFB3 Asp11-Leu139 (O #4337) were used for inverse PCR on pRS425-TFB3 (SB1968). The resulting ~8.3 kb fragment was ligated by intramolecular Gibson assembly.         |
| pLH366                                 | TFB3 ( $\Delta$ 8-75)-Flag1-TAP, LEU2, CEN/ARS, AmpR                                                                        | Warfield et al. (2016) MCB 36 (19): 2464-2475.                                                                                                                                                       |
| pSH1597                                | TFB3, URA3, CEN/ARS, AmpR                                                                                                   | Warfield et al. (2016) MCB 36 (19): 2464-2475.                                                                                                                                                       |
| pSH1542                                | TFB3-Flag1-TAP, LEU2, CEN/ARS, AmpR                                                                                         | Warfield et al. (2016) MCB 36 (19): 2464-2475.                                                                                                                                                       |
| pRS315/TFB3 $\Delta$ 2                 | TFB3 $\Delta$ 2 (1-275), LEU2, CEN/ARS, AmpR, fl+ ori                                                                       | Feaver et al. (2000) J. Biol. Chem. 275, 5941-5946                                                                                                                                                   |

**Table B. Yeast strains used in this study.**

| Strain                    | Genotype                                                                                                                                                      |
|---------------------------|---------------------------------------------------------------------------------------------------------------------------------------------------------------|
| <b>YSB744</b>             | <i>MATa ura3-1 leu2-3,112 trp1-1 his3-11,15 kin28Δ::leu2Δ::TRP1 ade2-1 ade3-22 can1-100</i> [pRS426-KIN28]                                                    |
| <b>SHY907/<br/>YF2456</b> | <i>MATa ura3Δ0 leu2Δ0 trp1Δ63 his3Δ200 ade2Δ::hisG lys2Δ0 met15Δ0 tfb3Δ::HygR tfb6Δ::KanMX</i> [pSH1597]. From Warfield et al. (2016) MCB 36 (19): 2464-2475. |
| <b>YSB3707</b>            | <i>MATa ura3Δ0 leu2Δ0 trp1Δ63 his3Δ200 ade2Δ::hisG lys2Δ0 met15Δ0 tfb3Δ::HygR tfb6Δ::KanMX</i> [pSH1542]                                                      |
| <b>YSB3710</b>            | <i>MATa ura3Δ0 leu2Δ0 trp1Δ63 his3Δ200 ade2Δ::hisG lys2Δ0 met15Δ0 tfb3Δ::HygR tfb6Δ::KanMX</i> [pRS425-TFB3 (1-144)]                                          |
| <b>YSB3712</b>            | <i>MATa ura3Δ0 leu2Δ0 trp1Δ63 his3Δ200 ade2Δ::hisG lys2Δ0 met15Δ0 tfb3Δ::HygR tfb6Δ::KanMX</i> [pRS425-TFB3]                                                  |
| <b>YSB3713</b>            | <i>MATa ura3Δ0 leu2Δ0 trp1Δ63 his3Δ200 ade2Δ::hisG lys2Δ0 met15Δ0 tfb3Δ::HygR tfb6Δ::KanMX</i> [pRS425-TFB3-MPK1]                                             |
| <b>YSB3715</b>            | <i>MATa ura3Δ0 leu2Δ0 trp1Δ63 his3Δ200 ade2Δ::hisG lys2Δ0 met15Δ0 tfb3Δ::HygR tfb6Δ::KanMX</i> [pRS425-TFB3-BUR2]                                             |
| <b>YSB3717</b>            | <i>MATa ura3Δ0 leu2Δ0 trp1Δ63 his3Δ200 ade2Δ::hisG lys2Δ0 met15Δ0 tfb3Δ::HygR tfb6Δ::KanMX</i> [pRS425-TFB3-CTK3]                                             |
| <b>YSB3722</b>            | <i>MATa ura3Δ0 leu2Δ0 trp1Δ63 his3Δ200 ade2Δ::hisG lys2Δ0 met15Δ0 tfb3Δ::HygR tfb6Δ::KanMX</i> [pRS424-TFB3 (1-251)]                                          |
| <b>YSB3704</b>            | <i>MATa ura3Δ0 leu2Δ0 trp1Δ63 his3Δ200 ade2Δ::hisG lys2Δ0 met15Δ0 tfb3Δ::HygR tfb6Δ::KanMX</i> [pRS424-TFB3 (1-144)]                                          |
| <b>YSB3723</b>            | <i>MATa ura3Δ0 leu2Δ0 trp1Δ63 his3Δ200 ade2Δ::hisG lys2Δ0 met15Δ0 tfb3Δ::HygR tfb6Δ::KanMX</i> [pRS424-TFB3 (1-144), pSH1542]                                 |
| <b>YSB3724</b>            | <i>MATa ura3Δ0 leu2Δ0 trp1Δ63 his3Δ200 ade2Δ::hisG lys2Δ0 met15Δ0 tfb3Δ::HygR tfb6Δ::KanMX</i> [pRS424-TFB3 (1-144), pRS425]                                  |
| <b>YSB3725</b>            | <i>MATa ura3Δ0 leu2Δ0 trp1Δ63 his3Δ200 ade2Δ::hisG lys2Δ0 met15Δ0 tfb3Δ::HygR tfb6Δ::KanMX</i> [pRS424-TFB3 (1-144), pRS425-TFB3 (1-11, 238-Stop)]            |
| <b>YSB3726</b>            | <i>MATa ura3Δ0 leu2Δ0 trp1Δ63 his3Δ200 ade2Δ::hisG lys2Δ0 met15Δ0 tfb3Δ::HygR tfb6Δ::KanMX</i> [pRS424-TFB3 (1-144), pRS315-TFB3 (1-11, 238-Stop)-Flag1-TAP]  |
| <b>YSB3727</b>            | <i>MATa ura3Δ0 leu2Δ0 trp1Δ63 his3Δ200 ade2Δ::hisG lys2Δ0 met15Δ0 tfb3Δ::HygR tfb6Δ::KanMX</i> [pRS424-TFB3 (1-144), pRS425-TFB3 (1-11, 139-Stop)]            |
| <b>YSB3728</b>            | <i>MATa ura3Δ0 leu2Δ0 trp1Δ63 his3Δ200 ade2Δ::hisG lys2Δ0 met15Δ0 tfb3Δ::HygR tfb6Δ::KanMX</i> [pRS424-TFB3 (1-144), pLH366]                                  |
| <b>YSB3729</b>            | <i>MATa ura3Δ0 leu2Δ0 trp1Δ63 his3Δ200 ade2Δ::hisG lys2Δ0 met15Δ0 tfb3Δ::HygR tfb6Δ::KanMX</i> [pRS424-TFB3 (1-251), pSH1542]                                 |
| <b>YSB3730</b>            | <i>MATa ura3Δ0 leu2Δ0 trp1Δ63 his3Δ200 ade2Δ::hisG lys2Δ0 met15Δ0 tfb3Δ::HygR tfb6Δ::KanMX</i> [pRS424-TFB3 (1-251), pRS425]                                  |
| <b>YSB3731</b>            | <i>MATa ura3Δ0 leu2Δ0 trp1Δ63 his3Δ200 ade2Δ::hisG lys2Δ0 met15Δ0 tfb3Δ::HygR tfb6Δ::KanMX</i> [pRS424-TFB3 (1-251), pRS425-TFB3 (1-11, 238-Stop)]            |
| <b>YSB3732</b>            | <i>MATa ura3Δ0 leu2Δ0 trp1Δ63 his3Δ200 ade2Δ::hisG lys2Δ0 met15Δ0 tfb3Δ::HygR tfb6Δ::KanMX</i> [pRS424-TFB3 (1-251), pRS315-TFB3 (1-11, 238-Stop)-Flag1-TAP]  |
| <b>YSB3733</b>            | <i>MATa ura3Δ0 leu2Δ0 trp1Δ63 his3Δ200 ade2Δ::hisG lys2Δ0 met15Δ0 tfb3Δ::HygR tfb6Δ::KanMX</i> [pRS424-TFB3 (1-251), pRS425-TFB3 (1-11, 139-Stop)]            |
| <b>YSB3734</b>            | <i>MATa ura3Δ0 leu2Δ0 trp1Δ63 his3Δ200 ade2Δ::hisG lys2Δ0 met15Δ0 tfb3Δ::HygR tfb6Δ::KanMX</i> [pRS424-TFB3 (1-251), pLH366]                                  |
| <b>YSB3786</b>            | <i>MATa ura3-1 leu2-3,112 trp1-1 his3-11,15 kin28Δ::leu2Δ::TRP1 ade2-1 ade3-22 can1-100</i> [pRS415-KIN28]                                                    |
| <b>YSB3787</b>            | <i>MATa ura3Δ0 leu2Δ0 trp1Δ63 his3Δ200 ade2Δ::hisG lys2Δ0 met15Δ0 tfb3Δ::HygR tfb6Δ::KanMX</i> [pRS424-TFB3]                                                  |
| <b>YSB3788</b>            | <i>MATa ura3Δ0 leu2Δ0 trp1Δ63 his3Δ200 ade2Δ::hisG lys2Δ0 met15Δ0 tfb3Δ::HygR tfb6Δ::KanMX</i> [pRS424-TFB3, pRS425]                                          |
| <b>YSB207</b>             | <i>MATa ura3-52 leu2-3,112 his3Δ200 tfb1Δ::LEU2</i> [pRS316-TFB1] From Matsui et al., (1995) Nucleic Acids Res 23, 767-772.                                   |

|               |                                                                                                                                    |
|---------------|------------------------------------------------------------------------------------------------------------------------------------|
| <b>YSB260</b> | <i>MATa ura3-52 leu2-3,112 his3Δ200 tfb1Δ::LEU2</i> [pRS313-tfb1-101] From Matsui et al., (1995)<br>Nucleic Acids Res 23, 767-772. |
|---------------|------------------------------------------------------------------------------------------------------------------------------------|

**Table C: ChIP-seq parameters for *S. cerevisiae* reads**

| Sample                                           | Total reads | Mapped reads | % Mapped reads | Deduplicated reads | % Deduplicated reads | Fragments average size | Fragments size std | Pearson correlation |
|--------------------------------------------------|-------------|--------------|----------------|--------------------|----------------------|------------------------|--------------------|---------------------|
| CJ1_ChIPseq_Input_Tfb3WT_Spike_R1_20221206       | 28060948    | 24316268     | 86.66%         | 17666200           | 62.96%               | 187.151693             | 54.84188419        |                     |
| CJ2_ChIPseq_Input_Tfb3WT_Spike_R2_20221206       | 25142766    | 21683658     | 86.24%         | 16285104           | 64.77%               | 183.7562841            | 52.72211465        |                     |
| CJ3_ChIPseq_Input_tfb3N-LC_Spike_R1_20221206     | 30338000    | 28318312     | 93.34%         | 19901330           | 65.60%               | 182.0606635            | 51.85993552        |                     |
| CJ4_ChIPseq_Input_tfb3N-LC_Spike_R2_20221206     | 25623514    | 23744682     | 92.67%         | 18112754           | 70.69%               | 193.12372              | 59.31659928        |                     |
| CJ5_ChIPseq_Input_tfb3N-C_Spike_R1_20221206      | 26168988    | 23924892     | 91.42%         | 18380502           | 70.24%               | 185.0257088            | 53.5344394         |                     |
| CJ6_ChIPseq_Input_tfb3N-C_Spike_R2_20221206      | 28575464    | 26292900     | 92.01%         | 20354770           | 71.23%               | 192.773337             | 58.00570866        |                     |
| CJ7_ChIPseq_Input_tfb3NL-C_Spike_R1_20221206     | 31451666    | 27197436     | 86.47%         | 19478246           | 61.93%               | 185.1408434            | 54.21921369        |                     |
| CJ8_ChIPseq_Input_tfb3NL-C_Spike_R2_20221206     | 27660176    | 24037478     | 86.90%         | 17810316           | 64.39%               | 187.0205919            | 55.0058291         |                     |
| CJ9_ChIPseq_IP_Tfb1_Tfb3WT_Spike_R1_20221206     | 21933424    | 18706082     | 85.29%         | 8523750            | 38.86%               | 178.9884375            | 50.4586975         |                     |
| CJ11_ChIPseq_IP_Tfb1_Tfb3WT_Spike_R2_20221206    | 31388434    | 27114844     | 86.38%         | 15064408           | 47.99%               | 180.6129835            | 50.89617922        |                     |
| CJ10_ChIPseq_IP_Kin28_Tfb3WT_Spike_R1_20221206   | 25212688    | 22084698     | 87.59%         | 11771758           | 46.69%               | 183.0545385            | 53.52558161        |                     |
| CJ12_ChIPseq_IP_Kin28_Tfb3WT_Spike_R2_20221206   | 27504962    | 24137616     | 87.76%         | 12353214           | 44.91%               | 187.8508748            | 55.94383818        |                     |
| CJ13_ChIPseq_IP_Tfb1_tfb3N-LC_Spike_R1_20221206  | 26079084    | 24104222     | 92.43%         | 14991702           | 57.49%               | 186.3978388            | 54.85202601        |                     |
| CJ15_ChIPseq_IP_Tfb1_tfb3N-LC_Spike_R2_20221206  | 28492222    | 26201452     | 91.96%         | 16217586           | 56.92%               | 184.8119941            | 53.90919534        |                     |
| CJ14_ChIPseq_IP_Kin28_tfb3N-LC_Spike_R1_20221206 | 26720222    | 24929216     | 93.30%         | 15482036           | 57.94%               | 186.9584852            | 55.33301124        |                     |
| CJ16_ChIPseq_IP_Kin28_tfb3N-LC_Spike_R2_20221206 | 30556826    | 28384914     | 92.89%         | 16973328           | 55.55%               | 191.2947476            | 56.93516834        |                     |
| CJ17_ChIPseq_IP_Tfb1_tfb3N-C_Spike_R1_20221206   | 28014174    | 25070362     | 89.49%         | 12797216           | 45.68%               | 186.2883061            | 55.37930129        |                     |
| CJ19_ChIPseq_IP_Tfb1_tfb3N-C_Spike_R2_20221206   | 23685496    | 20727300     | 87.51%         | 7118384            | 30.05%               | 181.9331486            | 52.28734443        |                     |
| CJ18_ChIPseq_IP_Kin28_tfb3N-C_Spike_R1_20221206  | 26253552    | 23887458     | 90.99%         | 13124260           | 49.99%               | 190.0250035            | 55.02351744        |                     |
| CJ20_ChIPseq_IP_Kin28_tfb3N-C_Spike_R2_20221206  | 27987324    | 25315522     | 90.45%         | 10788264           | 38.55%               | 186.4347784            | 54.96583003        |                     |
| CJ21_ChIPseq_IP_Tfb1_tfb3NL-C_Spike_R1_20221206  | 21097654    | 17251128     | 81.77%         | 5973408            | 28.31%               | 184.6293489            | 52.40626339        |                     |
| CJ23_ChIPseq_IP_Tfb1_tfb3NL-C_Spike_R2_20221206  | 25005018    | 21356392     | 85.41%         | 7346354            | 29.38%               | 182.4302594            | 52.97200481        |                     |
| CJ22_ChIPseq_IP_Kin28_tfb3NL-C_Spike_R1_20221206 | 22756574    | 19667140     | 86.42%         | 10115178           | 44.45%               | 181.6662182            | 52.00454101        |                     |
| CJ24_ChIPseq_IP_Kin28_tfb3NL-C_Spike_R2_20221206 | 24373472    | 21125784     | 86.68%         | 8198594            | 33.64%               | 197.0143442            | 60.81813163        |                     |
| CJ25_ChIPseq_IP_8WG16_Tfb3WT_Spike_R1_20221206   | 27441896    | 23822720     | 86.81%         | 18410874           | 67.09%               | 193.5061943            | 56.02529553        |                     |
| CJ28_ChIPseq_IP_8WG16_Tfb3WT_Spike_R2_20221206   | 25996340    | 22584706     | 86.88%         | 17075896           | 65.69%               | 194.006966             | 55.81883403        |                     |
| CJ26_ChIPseq_IP_3E8_Tfb3WT_Spike_R1_20221206     | 25838296    | 21654764     | 83.81%         | 14876982           | 57.58%               | 184.3699006            | 52.06012194        |                     |
| CJ29_ChIPseq_IP_3E8_Tfb3WT_Spike_R2_20221206     | 28040716    | 21924548     | 78.19%         | 15023372           | 53.58%               | 183.4677026            | 52.19602674        |                     |
| CJ31_ChIPseq_IP_8WG16_tfb3N-LC_Spike_R1_20221206 | 30495908    | 27080862     | 88.80%         | 18984972           | 62.25%               | 189.7476167            | 55.15932956        |                     |
| CJ34_ChIPseq_IP_8WG16_tfb3N-LC_Spike_R2_20221206 | 25196604    | 22133444     | 87.84%         | 16020930           | 63.58%               | 189.3908446            | 54.63351052        |                     |
| CJ32_ChIPseq_IP_3E8_tfb3N-LC_Spike_R1_20221206   | 27969570    | 25873014     | 92.50%         | 16869978           | 60.32%               | 191.6410608            | 55.85065663        |                     |
| CJ35_ChIPseq_IP_3E8_tfb3N-LC_Spike_R2_20221206   | 22792800    | 20375434     | 89.39%         | 13537306           | 59.39%               | 186.0942068            | 53.96482432        |                     |
| CJ37_ChIPseq_IP_8WG16_tfb3N-C_Spike_R1_20221206  | 27586338    | 24259098     | 87.94%         | 17339088           | 62.85%               | 185.0421983            | 51.76648932        |                     |
| CJ40_ChIPseq_IP_8WG16_tfb3N-C_Spike_R2_20221206  | 23630278    | 20684686     | 87.53%         | 14216836           | 60.16%               | 192.4918004            | 53.96706389        |                     |
| CJ38_ChIPseq_IP_3E8_tfb3N-C_Spike_R1_20221206    | 25817692    | 22883660     | 88.64%         | 14284602           | 55.33%               | 181.8681642            | 51.2903419         |                     |

|                                                    |          |          |        |          |        |             |             |        |
|----------------------------------------------------|----------|----------|--------|----------|--------|-------------|-------------|--------|
| CJ41_ChiPseq_IP_3E8_tfb3N-C_Spike_R2_20221206      | 22984208 | 20364348 | 88.60% | 10643430 | 46.31% | 179.9475536 | 48.44600528 |        |
| CJ43_ChiPseq_IP_8WG16_tfb3NL-C_Spike_R1_20221206   | 31686578 | 26214330 | 82.73% | 18765146 | 59.22% | 198.0127415 | 55.85851478 |        |
| CJ46_ChiPseq_IP_8WG16_tfb3NL-C_Spike_R2_20221206   | 28413026 | 23563850 | 82.93% | 16894050 | 59.46% | 199.4182276 | 56.07545824 |        |
| CJ44_ChiPseq_IP_3E8_tfb3NL-C_Spike_R1_20221206     | 22729102 | 18672918 | 82.15% | 10778412 | 47.42% | 194.0807191 | 56.0081025  |        |
| CJ47_ChiPseq_IP_3E8_tfb3NL-C_Spike_R2_20221206     | 27089408 | 22290936 | 82.29% | 12664346 | 46.75% | 190.8298633 | 54.2312006  |        |
| ChiPseq_Input_Tfb3WT_Spike_CJ1-CJ2_20221206        |          |          |        | 33951304 |        | 185.523049  | 53.86224722 | 0.9987 |
| ChiPseq_Input_tfb3NL-C_Spike_CJ3-CJ4_20221206      |          |          |        | 38014084 |        | 187.3319314 | 55.81203566 | 0.9929 |
| ChiPseq_Input_tfb3N-C_Spike_CJ5-CJ6_20221206       |          |          |        | 38735272 |        | 189.0969643 | 56.06225203 | 0.9982 |
| ChiPseq_Input_tfb3NL-C_Spike_CJ7-CJ8_20221206      |          |          |        | 37288562 |        | 186.0386767 | 54.60441417 | 0.9918 |
| ChiPseq_IP_Tfb1_Tfb3WT_Spike_CJ9-CJ11_20221206     |          |          |        | 23588158 |        | 180.0259422 | 50.74452676 | 0.9937 |
| ChiPseq_IP_Kin28_Tfb3WT_Spike_CJ10-CJ12_20221206   |          |          |        | 24124972 |        | 185.5105069 | 54.82962941 | 0.9994 |
| ChiPseq_IP_Tfb1_tfb3NL-C_Spike_CJ13-CJ15_20221206  |          |          |        | 31209288 |        | 185.5737709 | 54.36990612 | 0.9955 |
| ChiPseq_IP_Kin28_tfb3NL-C_Spike_CJ14-CJ16_20221206 |          |          |        | 32455364 |        | 189.2262399 | 56.21833234 | 0.9948 |
| ChiPseq_IP_Tfb1_tfb3N-C_Spike_CJ17-CJ19_20221206   |          |          |        | 19915600 |        | 184.7316529 | 54.334475   | 0.988  |
| ChiPseq_IP_Kin28_tfb3N-C_Spike_CJ18-CJ20_20221206  |          |          |        | 23912524 |        | 188.4052541 | 55.02650556 | 0.9945 |
| ChiPseq_IP_Tfb1_tfb3NL-C_Spike_CJ21-CJ23_20221206  |          |          |        | 13319762 |        | 183.4164677 | 52.73038151 | 0.9976 |
| ChiPseq_IP_Kin28_tfb3NL-C_Spike_CJ22-CJ24_20221206 |          |          |        | 18313772 |        | 188.5371705 | 56.63808578 | 0.9967 |
| ChiPseq_IP_8WG16_Tfb3WT_Spike_CJ25-CJ28_20221206   |          |          |        | 35486770 |        | 193.7471609 | 55.92660148 | 0.9982 |
| ChiPseq_IP_3E8_Tfb3WT_Spike_CJ26-CJ29_20221206     |          |          |        | 29900354 |        | 183.916593  | 52.13040131 | 0.9802 |
| ChiPseq_IP_8WG16_tfb3NL-C_Spike_CJ31-CJ34_20221206 |          |          |        | 35005902 |        | 189.5843351 | 54.91959214 | 0.9305 |
| ChiPseq_IP_3E8_tfb3NL-C_Spike_CJ32-CJ35_20221206   |          |          |        | 30407284 |        | 189.1716045 | 55.08808583 | 0.9763 |
| ChiPseq_IP_8WG16_tfb3N-C_Spike_CJ37-CJ40_20221206  |          |          |        | 31555924 |        | 188.3984547 | 52.89928193 | 0.9869 |
| ChiPseq_IP_3E8_tfb3N-C_Spike_CJ38-CJ41_20221206    |          |          |        | 24928032 |        | 181.0481281 | 50.10467126 | 0.9863 |
| ChiPseq_IP_8WG16_tfb3NL-C_Spike_CJ43-CJ46_20221206 |          |          |        | 35659196 |        | 198.6786105 | 55.96579816 | 0.985  |
| ChiPseq_IP_3E8_tfb3NL-C_Spike_CJ44-CJ47_20221206   |          |          |        | 23442758 |        | 192.324528  | 55.07913115 | 0.9835 |

**Table D: CHIP-seq parameters for *S. pombe* reads**

| Sample                                           | Total reads | Mapped reads | % Mapped reads | Deduplicated reads | % Deduplicated reads | Fragments average size | Fragments size std |
|--------------------------------------------------|-------------|--------------|----------------|--------------------|----------------------|------------------------|--------------------|
| CJ1_Chipseq_Input_Tfb3WT_Spike_R1_20221206       | 28060948    | 846652       | 3.02%          | 623366             | 2.22%                | 185.1013305            | 53.83830897        |
| CJ2_Chipseq_Input_Tfb3WT_Spike_R2_20221206       | 25142766    | 781614       | 3.11%          | 596604             | 2.37%                | 181.5391013            | 51.55880425        |
| CJ3_Chipseq_Input_tfb3N-LC_Spike_R1_20221206     | 30338000    | 695654       | 2.29%          | 492432             | 1.62%                | 179.9999756            | 50.50852705        |
| CJ4_Chipseq_Input_tfb3N-LC_Spike_R2_20221206     | 25623514    | 560076       | 2.19%          | 428710             | 1.67%                | 191.1615171            | 58.56076855        |
| CJ5_Chipseq_Input_tfb3N-C_Spike_R1_20221206      | 26168988    | 670838       | 2.56%          | 519310             | 1.98%                | 182.5892319            | 52.50833339        |
| CJ6_Chipseq_Input_tfb3N-C_Spike_R2_20221206      | 28575464    | 645568       | 2.26%          | 503894             | 1.76%                | 189.4855466            | 56.74773664        |
| CJ7_Chipseq_Input_tfb3NL-C_Spike_R1_20221206     | 31451666    | 1368696      | 4.35%          | 990526             | 3.15%                | 183.7836241            | 53.83598574        |
| CJ8_Chipseq_Input_tfb3NL-C_Spike_R2_20221206     | 27660176    | 1332618      | 4.82%          | 995828             | 3.60%                | 185.958535             | 54.71051443        |
| CJ9_Chipseq_IP_Tfb1_Tfb3WT_Spike_R1_20221206     | 21933424    | 732152       | 3.34%          | 335374             | 1.53%                | 176.9659902            | 49.48895332        |
| CJ11_Chipseq_IP_Tfb1_Tfb3WT_Spike_R2_20221206    | 31388434    | 1070344      | 3.41%          | 619132             | 1.97%                | 177.9171195            | 49.28553322        |
| CJ10_Chipseq_IP_Kin28_Tfb3WT_Spike_R1_20221206   | 25212688    | 674476       | 2.68%          | 379710             | 1.51%                | 179.4113244            | 51.7300538         |
| CJ12_Chipseq_IP_Kin28_Tfb3WT_Spike_R2_20221206   | 27504962    | 747658       | 2.72%          | 408752             | 1.49%                | 184.1809263            | 54.14960845        |
| CJ13_Chipseq_IP_Tfb1_tfb3N-LC_Spike_R1_20221206  | 26079084    | 728480       | 2.79%          | 457532             | 1.75%                | 183.5296854            | 53.51132098        |
| CJ15_Chipseq_IP_Tfb1_tfb3N-LC_Spike_R2_20221206  | 28492222    | 790138       | 2.77%          | 494990             | 1.74%                | 181.7431908            | 52.49740535        |
| CJ14_Chipseq_IP_Kin28_tfb3N-LC_Spike_R1_20221206 | 26720222    | 666442       | 2.49%          | 422284             | 1.58%                | 183.0614989            | 53.28236879        |
| CJ16_Chipseq_IP_Kin28_tfb3N-LC_Spike_R2_20221206 | 30556826    | 719998       | 2.36%          | 434818             | 1.42%                | 187.2660699            | 55.15772767        |
| CJ17_Chipseq_IP_Tfb1_tfb3N-C_Spike_R1_20221206   | 28014174    | 1063794      | 3.80%          | 544726             | 1.94%                | 182.2505076            | 53.30852239        |
| CJ19_Chipseq_IP_Tfb1_tfb3N-C_Spike_R2_20221206   | 23685496    | 1072190      | 4.53%          | 362356             | 1.53%                | 178.0362296            | 50.24777303        |
| CJ18_Chipseq_IP_Kin28_tfb3N-C_Spike_R1_20221206  | 26253552    | 767778       | 2.92%          | 433724             | 1.65%                | 185.1550525            | 53.05492754        |
| CJ20_Chipseq_IP_Kin28_tfb3N-C_Spike_R2_20221206  | 27987324    | 834902       | 2.98%          | 372238             | 1.33%                | 180.7236016            | 51.9326008         |
| CJ21_Chipseq_IP_Tfb1_tfb3NL-C_Spike_R1_20221206  | 21097654    | 1141534      | 5.41%          | 378344             | 1.79%                | 182.2998065            | 51.77239721        |
| CJ23_Chipseq_IP_Tfb1_tfb3NL-C_Spike_R2_20221206  | 25005018    | 1487086      | 5.95%          | 495676             | 1.98%                | 180.1907738            | 52.38100476        |
| CJ22_Chipseq_IP_Kin28_tfb3NL-C_Spike_R1_20221206 | 22756574    | 1136130      | 4.99%          | 610830             | 2.68%                | 177.3449569            | 49.83973602        |
| CJ24_Chipseq_IP_Kin28_tfb3NL-C_Spike_R2_20221206 | 24373472    | 1178548      | 4.84%          | 458122             | 1.88%                | 192.6899821            | 58.951525          |
| CJ25_Chipseq_IP_8WG16_Tfb3WT_Spike_R1_20221206   | 27441896    | 1128564      | 4.11%          | 884000             | 3.22%                | 190.3345271            | 54.68234901        |
| CJ28_Chipseq_IP_8WG16_Tfb3WT_Spike_R2_20221206   | 25996340    | 1092832      | 4.20%          | 835682             | 3.21%                | 190.8983728            | 54.47781093        |
| CJ26_Chipseq_IP_3E8_Tfb3WT_Spike_R1_20221206     | 25838296    | 1662118      | 6.43%          | 1154128            | 4.47%                | 181.3311574            | 50.62594455        |
| CJ29_Chipseq_IP_3E8_Tfb3WT_Spike_R2_20221206     | 28040716    | 1958358      | 6.98%          | 1357596            | 4.84%                | 180.5729215            | 50.74377243        |
| CJ27_Chipseq_IP_3E10_Tfb3WT_Spike_R1_20221206    | 30278142    | 3027838      | 10.00%         | 507444             | 1.68%                | 180.0213304            | 51.4626712         |
| CJ30_Chipseq_IP_3E10_Tfb3WT_Spike_R2_20221206    | 31671338    | 3343260      | 10.56%         | 484610             | 1.53%                | 178.9929964            | 52.28392339        |
| CJ31_Chipseq_IP_8WG16_tfb3N-LC_Spike_R1_20221206 | 30495908    | 2113824      | 6.93%          | 1484396            | 4.87%                | 185.3269855            | 53.05985514        |
| CJ34_Chipseq_IP_8WG16_tfb3N-LC_Spike_R2_20221206 | 25196604    | 1773960      | 7.04%          | 1293002            | 5.13%                | 185.4773775            | 52.69852257        |
| CJ32_Chipseq_IP_3E8_tfb3N-LC_Spike_R1_20221206   | 27969570    | 1003486      | 3.59%          | 657046             | 2.35%                | 187.0917653            | 53.92475137        |
| CJ35_Chipseq_IP_3E8_tfb3N-LC_Spike_R2_20221206   | 22792800    | 1243894      | 5.46%          | 824336             | 3.62%                | 181.9736928            | 51.7804567         |

|                                                    |          |         |        |         |       |             |             |
|----------------------------------------------------|----------|---------|--------|---------|-------|-------------|-------------|
| CJ33_ChiPseq_IP_3E10_tfb3N-LC_Spike_R1_20221206    | 42940988 | 1247534 | 2.91%  | 627904  | 1.46% | 183.4230264 | 52.97077163 |
| CJ36_ChiPseq_IP_3E10_tfb3N-LC_Spike_R2_20221206    | 36916590 | 1791252 | 4.85%  | 508930  | 1.38% | 186.0975183 | 56.74859061 |
| CJ37_ChiPseq_IP_8WG16_tfb3N-C_Spike_R1_20221206    | 27586338 | 1659278 | 6.01%  | 1199388 | 4.35% | 180.2060768 | 49.49942587 |
| CJ40_ChiPseq_IP_8WG16_tfb3N-C_Spike_R2_20221206    | 23630278 | 1365400 | 5.78%  | 950242  | 4.02% | 187.1708954 | 51.92034006 |
| CJ38_ChiPseq_IP_3E8_tfb3N-C_Spike_R1_20221206      | 25817692 | 1314274 | 5.09%  | 820672  | 3.18% | 177.7428912 | 49.17595847 |
| CJ41_ChiPseq_IP_3E8_tfb3N-C_Spike_R2_20221206      | 22984208 | 1090638 | 4.75%  | 568434  | 2.47% | 175.8922302 | 46.61382335 |
| CJ39_ChiPseq_IP_3E10_tfb3N-C_Spike_R1_20221206     | 51180370 | 2894724 | 5.66%  | 254696  | 0.50% | 179.5519757 | 51.41823937 |
| CJ42_ChiPseq_IP_3E10_tfb3N-C_Spike_R2_20221206     | 34504488 | 1583728 | 4.59%  | 258710  | 0.75% | 183.0624792 | 52.30351672 |
| CJ43_ChiPseq_IP_8WG16_tfb3N-LC_Spike_R1_20221206   | 31686578 | 2766612 | 8.73%  | 2016986 | 6.37% | 194.0235222 | 54.1382237  |
| CJ46_ChiPseq_IP_8WG16_tfb3N-LC_Spike_R2_20221206   | 28413026 | 2677376 | 9.42%  | 1948088 | 6.86% | 195.6566202 | 54.61740573 |
| CJ44_ChiPseq_IP_3E8_tfb3N-LC_Spike_R1_20221206     | 22729102 | 1896804 | 8.35%  | 1092670 | 4.81% | 190.4241445 | 54.41026838 |
| CJ47_ChiPseq_IP_3E8_tfb3N-LC_Spike_R2_20221206     | 27089408 | 2631848 | 9.72%  | 1495020 | 5.52% | 187.6967934 | 52.80320334 |
| CJ45_ChiPseq_IP_3E10_tfb3N-LC_Spike_R1_20221206    | 30375814 | 2941948 | 9.69%  | 455950  | 1.50% | 181.3833798 | 54.21909823 |
| CJ48_ChiPseq_IP_3E10_tfb3N-LC_Spike_R2_20221206    | 31921716 | 4194896 | 13.14% | 340390  | 1.07% | 181.5553042 | 51.34714194 |
| ChIPseq_Input_Tfb3WT_Spike_CJ1-CJ2_20221206        |          |         |        | 1219970 |       | 183.3592875 | 52.76588264 |
| ChIPseq_Input_tfb3N-LC_Spike_CJ3-CJ4_20221206      |          |         |        | 921142  |       | 185.1946844 | 54.68865897 |
| ChIPseq_Input_tfb3N-C_Spike_CJ5-CJ6_20221206       |          |         |        | 1023204 |       | 185.9854379 | 54.74584347 |
| ChIPseq_Input_tfb3N-LC_Spike_CJ7-CJ8_20221206      |          |         |        | 1986354 |       | 184.8739822 | 54.28704405 |
| ChIPseq_IP_Tfb1_Tfb3WT_Spike_CJ9-CJ11_20221206     |          |         |        | 954506  |       | 177.5829319 | 49.3591389  |
| ChIPseq_IP_Kin28_Tfb3WT_Spike_CJ10-CJ12_20221206   |          |         |        | 788462  |       | 181.8839665 | 53.0516712  |
| ChIPseq_IP_Tfb1_tfb3N-LC_Spike_CJ13-CJ15_20221206  |          |         |        | 952522  |       | 182.601311  | 52.99430978 |
| ChIPseq_IP_Kin28_tfb3N-LC_Spike_CJ14-CJ16_20221206 |          |         |        | 857102  |       | 185.1945276 | 54.282517   |
| ChIPseq_IP_Tfb1_tfb3N-C_Spike_CJ17-CJ19_20221206   |          |         |        | 907082  |       | 180.5670116 | 52.14821133 |
| ChIPseq_IP_Kin28_tfb3N-C_Spike_CJ18-CJ20_20221206  |          |         |        | 805962  |       | 183.1083624 | 52.58591834 |
| ChIPseq_IP_Tfb1_tfb3N-LC_Spike_CJ21-CJ23_20221206  |          |         |        | 874020  |       | 181.1037276 | 52.12883967 |
| ChIPseq_IP_Kin28_tfb3N-LC_Spike_CJ22-CJ24_20221206 |          |         |        | 1068952 |       | 183.9213922 | 54.46554015 |
| ChIPseq_IP_8WG16_Tfb3WT_Spike_CJ25-CJ28_20221206   |          |         |        | 1719682 |       | 190.6085288 | 54.58374492 |
| ChIPseq_IP_3E8_Tfb3WT_Spike_CJ26-CJ29_20221206     |          |         |        | 2511724 |       | 180.9213281 | 50.69105321 |
| ChIPseq_IP_3E10_Tfb3WT_Spike_CJ27-CJ30_20221206    |          |         |        | 992054  |       | 179.518998  | 51.86796548 |
| ChIPseq_IP_8WG16_tfb3N-LC_Spike_CJ31-CJ34_20221206 |          |         |        | 2777398 |       | 185.3969996 | 52.89198006 |
| ChIPseq_IP_3E8_tfb3N-LC_Spike_CJ32-CJ35_20221206   |          |         |        | 1481382 |       | 184.2437413 | 52.80350633 |
| ChIPseq_IP_3E10_tfb3N-LC_Spike_CJ33-CJ36_20221206  |          |         |        | 1136834 |       | 184.6203245 | 54.7103866  |
| ChIPseq_IP_8WG16_tfb3N-C_Spike_CJ37-CJ40_20221206  |          |         |        | 2149630 |       | 183.2848686 | 50.70197932 |
| ChIPseq_IP_3E8_tfb3N-C_Spike_CJ38-CJ41_20221206    |          |         |        | 1389106 |       | 176.985585  | 48.15256033 |
| ChIPseq_IP_3E10_tfb3N-C_Spike_CJ39-CJ42_20221206   |          |         |        | 513406  |       | 181.3209507 | 51.89581686 |
| ChIPseq_IP_8WG16_tfb3N-LC_Spike_CJ43-CJ46_20221206 |          |         |        | 3965074 |       | 194.8258827 | 54.38029447 |
| ChIPseq_IP_3E8_tfb3N-LC_Spike_CJ44-CJ47_20221206   |          |         |        | 2587690 |       | 188.8484363 | 53.50462746 |
| ChIPseq_IP_3E10_tfb3N-LC_Spike_CJ45-CJ48_20221206  |          |         |        | 796340  |       | 181.4568677 | 53.01054631 |
