# Supplementary figures and images for: Uncoupling the TFIIH Core and Kinase Modules Leads To Misregulated RNA Polymerase II CTD Serine 5 Phosphorylation
Source: eLife journal article supplement (doi:10.7554/elife.110091), 2026-01-27

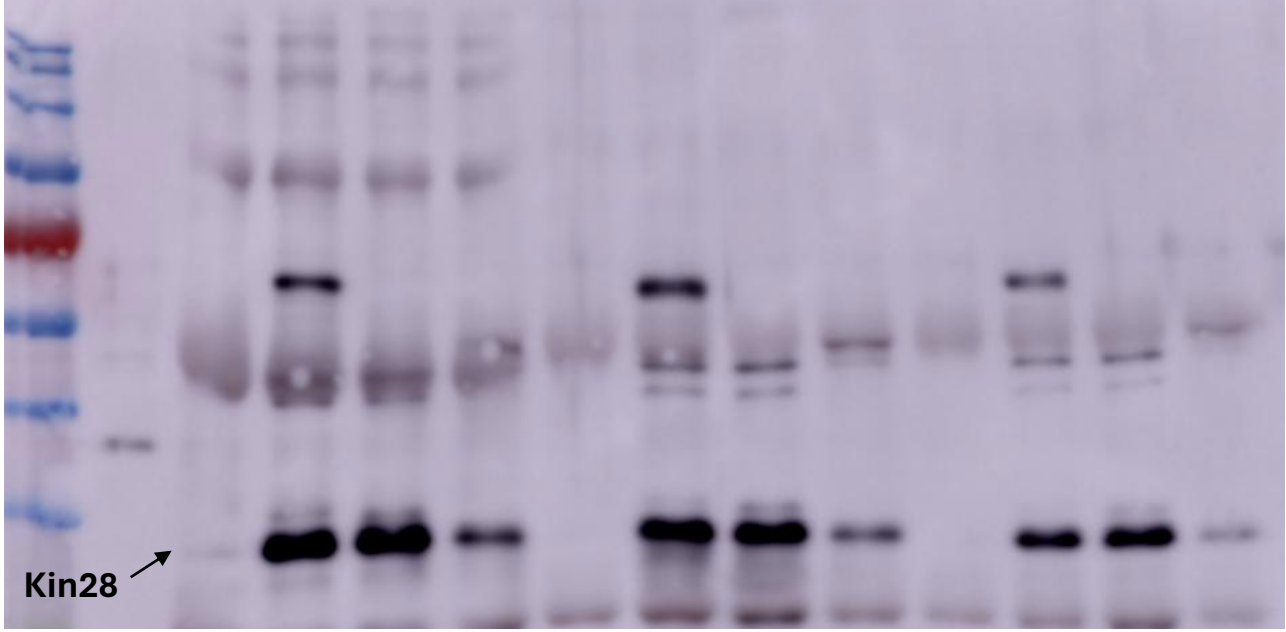

**Kin28** →

Supplement: fig3-figsupp1-data1 [file Figure 3 - Figure Supplement 1 - Source Data 1 .pdf › Figure 3 - Figure Supplement 1 - Source Data 1 .pdf]

CTD  
Ser2P

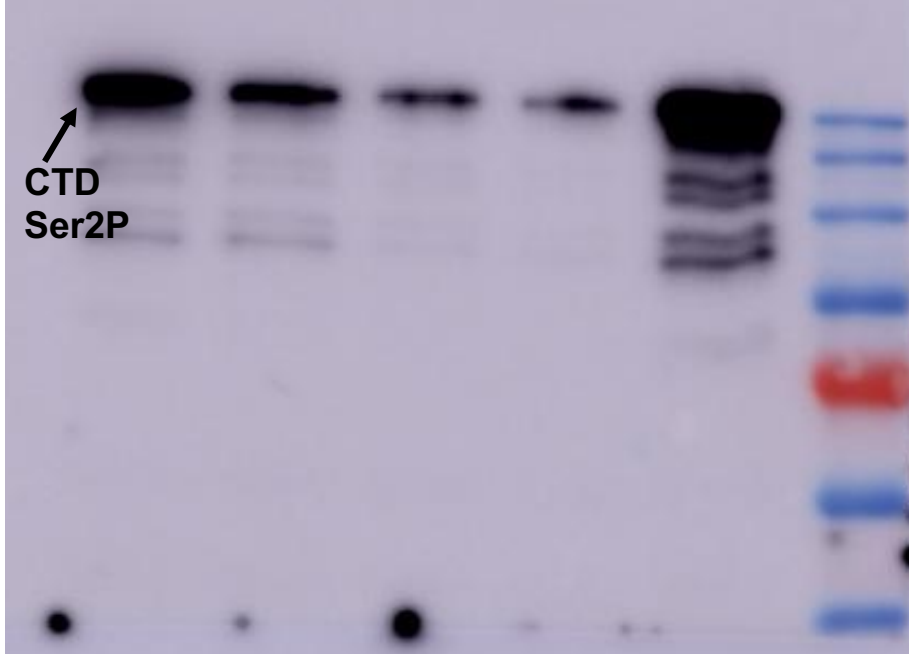

Supplement: fig5-figsupp2-data3 [file Figure 5 - Figure Supplement 2 - Source Data 3.pdf › Figure 5 - Figure Supplement 2 - Source Data 3.pdf]
